# Supplementary material for: Virtual Learning Environment to Develop Specimen Collection Skills for Dried Blood Spots
Source: Research Square preprint supplement (doi:10.21203/rs.3.rs-2641399/v1), 2023-03-20
Supplement: Supplementary file 1 [file a5e980c5cedb82918ddae865.pdf]

**Table 1: Unacceptable DBS specimen received before and after DBS collection training.**

| <b>Unacceptable Sample</b>                  | <b>Before training<br/>(Jan-Dec 2020)</b> | <b>After Training<br/>(Jan-Jun 2021)</b> |
|---------------------------------------------|-------------------------------------------|------------------------------------------|
| Samples received                            | 5220                                      | 3920                                     |
| DBS not soaked properly                     | 29                                        | 5                                        |
| Less than 2 complete circles in a filter    | 9                                         | 6                                        |
| Sample quantity not sufficient for analysis | 5                                         | 3                                        |
| Clotted sample                              | 1                                         | 1                                        |
| Serum rings                                 | 0                                         | 0                                        |
| Sample not dried properly                   | 0                                         | 0                                        |
| Contaminated sample                         | 0                                         | 0                                        |
| Total unacceptable samples                  | 44 (0.84%)                                | 15 (0.38%)                               |
