# Supplementary material for: Virtual Learning Environment to Develop Specimen Collection Skills for Dried Blood Spots
Source: Research Square preprint supplement (doi:10.21203/rs.3.rs-2641399/v1), 2023-03-20
Supplement: Supplementary file 2 [file ad1d80f888761cc5e4d127e4.pdf]

**Table 2: Comparison of two training methods for DBS Specimen collection training.**

| <b>Onsite Training</b>                                                                                                 | <b>VLE based Trainings</b>                                                                                                                                                           |
|------------------------------------------------------------------------------------------------------------------------|--------------------------------------------------------------------------------------------------------------------------------------------------------------------------------------|
| Faculty time is required for both developing and delivering the course                                                 | One-time faculty engagement required in developing the course and at the time of competence assessment. However, it imposes less burden on faculty time compared to onsite training. |
| Synchronous sessions, hence, not all participants can attend it at the same time                                       | Asynchronous teaching-AHPs can attempt the course at their own pace and time.                                                                                                        |
| Need to be arranged repeatedly for the new AHP recruits                                                                | The course once developed can be used to train new AHP recruits as well.                                                                                                             |
| Separate sessions need to be conducted for hospitals in different areas. And not many AHPs can be trained at one time. | Multiple AHPs of different areas, /hospitals can be trained at the same time.                                                                                                        |
| Need larger spaces/conference rooms to conduct session, to abide by the SOPs post-COVID                                | A mobile application for the Moodle can be made available to AHPs.                                                                                                                   |
| Logistic and administrative support required                                                                           | Minimal logistics required for the competence assessment only.                                                                                                                       |
| Competence assessments can be done onsite                                                                              | Competence assessments cannot be done. You need to call AHPs onsite for it.                                                                                                          |
| Require laptop, multimedia, and appropriate conference room/space to conduct onsite sessions                           | Require licensed VLE, training of persons to develop and conduct courses via VLEs                                                                                                    |

*Where VLE stands for virtual learning environment, AHPs stands for allied health professionals, SOPs stands for standard operating procedures.*
